# Supplementary material
Source: Springer Nature journal article supplement (https://www.springermedizin.de/resource/supplementary/12913_2006_432_MOESM4_ESM.pdf/9535196)
Supplement: MOESM4 [file 9535196]

**Additional File 4** Relationship between risk-adjusted mortality and processes of care by several strata – type of correlation, condition and organisation. Bracketed ( ) figures are the most optimistic intuitive count if the three studies from Additional File 2 are included in which the relationship between quality of care and mortality was influenced by one outlier hospital.

| Unit of analysis                            | Type of relationship between risk-adjusted mortality and quality of care                                                |                                                                                          |                                                      |
|---------------------------------------------|-------------------------------------------------------------------------------------------------------------------------|------------------------------------------------------------------------------------------|------------------------------------------------------|
|                                             | Intuitive                                                                                                               | No correlation                                                                           | Paradoxical                                          |
| <b>(A) Type of measurement</b>              |                                                                                                                         |                                                                                          |                                                      |
| <b>Direct</b>                               | <b>15 (18) studies</b><br>[39, 41, 43, 44, 45, 46, 47, 50, 53, 54, 55, 57, 58, 61, 63 (51, 59, 62)]                     | <b>15 (12) studies</b><br>[38, 40, 41, 42, 46, 48, 50, 52, 55, 57, 58, 60, (51, 59, 62)] | <b>5 studies</b><br>[43, 46, 49, 53, 55]             |
| <b>Indirect</b>                             | <b>8 studies</b><br>[64, 65, 66, 68, 69, 70, 71, 73]                                                                    | <b>4 studies</b><br>[67, 68, 71, 74]                                                     | <b>4 studies</b><br>[66, 71, 72, 74]                 |
| <b>Total</b>                                | <b>23 (26) studies</b>                                                                                                  | <b>19 (16) studies</b>                                                                   | <b>9 studies</b>                                     |
| <b>(B) Clinical Condition</b>               |                                                                                                                         |                                                                                          |                                                      |
| <b>AMI</b>                                  | <b>12 studies</b><br>[50, 53, 54, 55, 57, 58, 64, 65, 66, 68, 69, 71]                                                   | <b>7 studies</b><br>[41, 48, 50, 55, 67, 68, 71]                                         | <b>4 studies</b><br>[53, 55, 66, 71]                 |
| <b>Stroke</b>                               | <b>0 (2) studies</b><br>[(51, 62)]                                                                                      | <b>3 (1) studies</b><br>[41, (51, 62)]                                                   | <b>1 study</b><br>[49]                               |
| <b>Orthopaedics, trauma, ICU and sepsis</b> | <b>2 (3) studies</b><br>[39, 73, (59)]                                                                                  | <b>4 (3) studies</b><br>[42, 57, 58, (59)]                                               | <b>2 studies</b><br>[43, 72]                         |
| <b>Dialysis</b>                             | <b>1 study</b><br>[47]                                                                                                  | <b>1 study</b><br>[52]                                                                   | <b>0 studies</b>                                     |
| <b>HIV/PCP</b>                              | <b>0 studies</b>                                                                                                        | <b>2 studies</b><br>[40, 60]                                                             | <b>0 studies</b>                                     |
| <b>(C) Organisation</b>                     |                                                                                                                         |                                                                                          |                                                      |
| <b>Co-operative cardiovascular project</b>  | <b>5 studies</b><br>[64, 65, 66, 68, 71]                                                                                | <b>3 studies</b><br>[67, 68, 71]                                                         | <b>2 studies</b><br>[66, 71]                         |
| <b>Health Care Financing Administration</b> | <b>4 studies</b><br>[46, 53, 70]                                                                                        | <b>2 studies</b><br>[46, 50]                                                             | <b>2 studies</b><br>[46, 53]                         |
| <b>Veterans Affairs</b>                     | <b>2 studies</b><br>[43, 44]                                                                                            | <b>2 studies</b><br>[38, 60]                                                             | <b>1 study</b><br>[43]                               |
| <b>(D) Data source for risk adjustment</b>  |                                                                                                                         |                                                                                          |                                                      |
| <b>Clinical</b>                             | <b>17 (20) studies</b><br>[39, 41, 43, 45, 50, 51, 52, 54, 55, 59, 61, 62, 64, 65, 66, 68, 69, 70, 71, 73 (51, 59, 62)] | <b>12 (15) studies</b><br>[40, 41, 42, 48, 50, 53, 55, 60, 67, 68, 71, 74 (51, 59, 62)]  | <b>8 studies</b><br>[43, 49, 53, 55, 66, 71, 72, 74] |
| <b>Administrative</b>                       | <b>5 studies</b><br>[44, 46, 47, 58, 63]                                                                                | <b>3 studies</b><br>[38, 46, 58]                                                         | <b>1 study</b><br>[46]                               |
